# Supplementary material for: Quantification of extremal dependence in spatial natural hazard footprints: independence of windstorm gust speeds and its impact on aggregate losses
Source: Copernicus journal article supplement (doi:10.5194/nhess-18-2933-2018), 2018-11-08
Supplement: Supplementary file 7 [file nhess-18-2933-2018-supplement.zip]

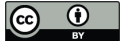

## *Supplement of*

# **Quantification of extremal dependence in spatial natural hazard footprints: independence of windstorm gust speeds and its impact on aggregate losses**

**Laura C. Dawkins and David B. Stephenson**

*Correspondence to:* Laura C. Dawkins ([l.c.dawkins@exeter.ac.uk](mailto:l.c.dawkins@exeter.ac.uk))

- [nhess-18-2933-2018-supplement-title-page.pdf](#)
- [Dawkins\\_SupMat](#)
  - [.DS\\_Store](#)
  - [Dawkins\\_SupMaterial.pdf](#)
  - [Dawkins\\_SupMaterial.tex](#)
  - [f01\\_sup.pdf](#)
  - [f02\\_sup.pdf](#)
  - [f03\\_sup.pdf](#)
  - [f04\\_sup.pdf](#)
  - [f05\\_sup.pdf](#)

The copyright of individual parts of the supplement might differ from the CC BY 4.0 License.
