# Supplementary figures and images for: Quantification of extremal dependence in spatial natural hazard footprints: independence of windstorm gust speeds and its impact on aggregate losses
Source: Copernicus journal article supplement (doi:10.5194/nhess-18-2933-2018), 2018-11-08

Latitude

70  
60  
50  
40  
30

-10

0

10

20

30

40

50

Longitude

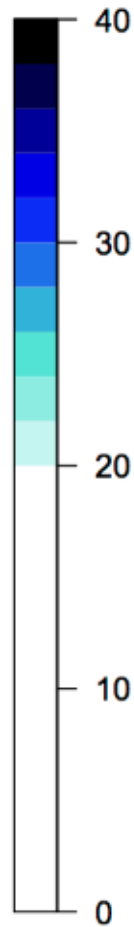

Supplement: Supplementary file 1 [file nhess-18-2933-2018-supplement.zip]

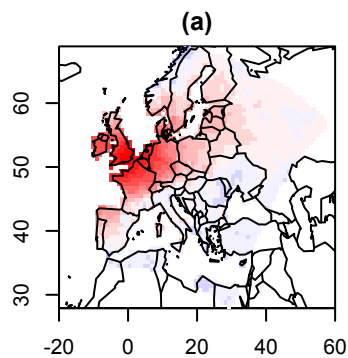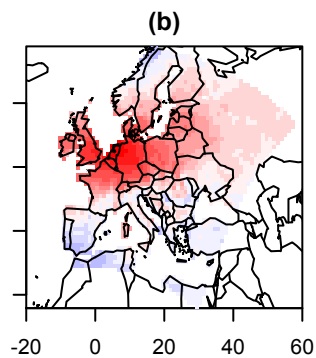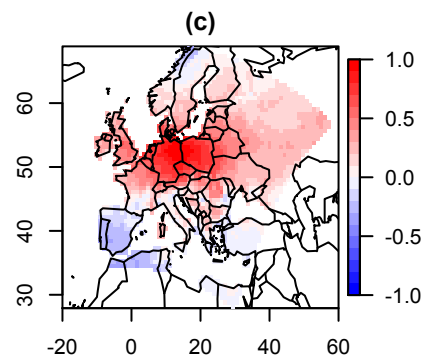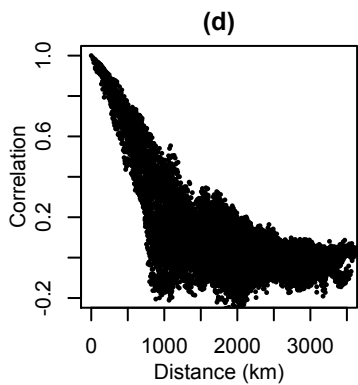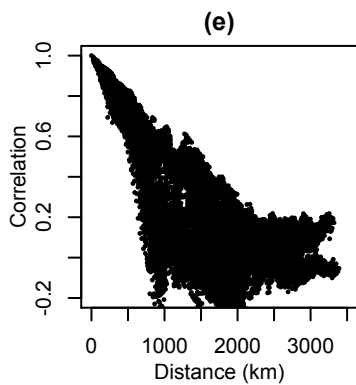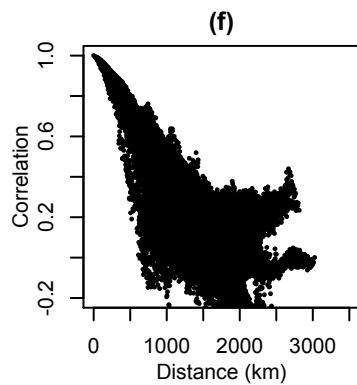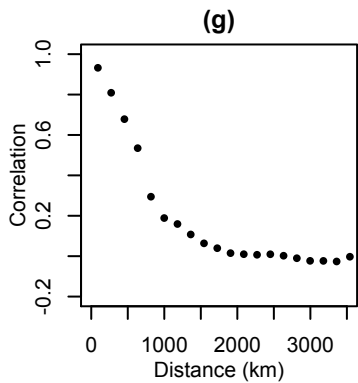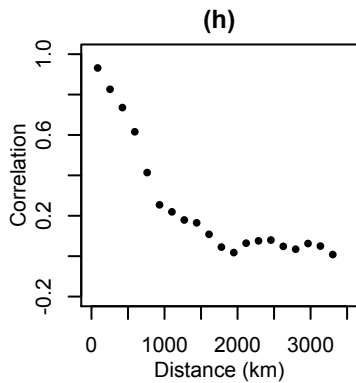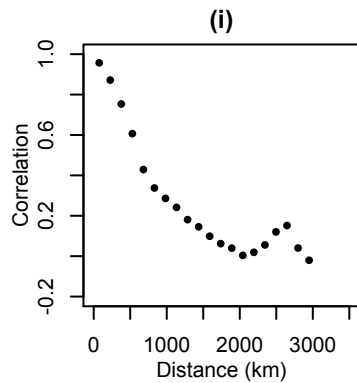

Supplement: Supplementary file 3 [file nhess-18-2933-2018-supplement.zip]

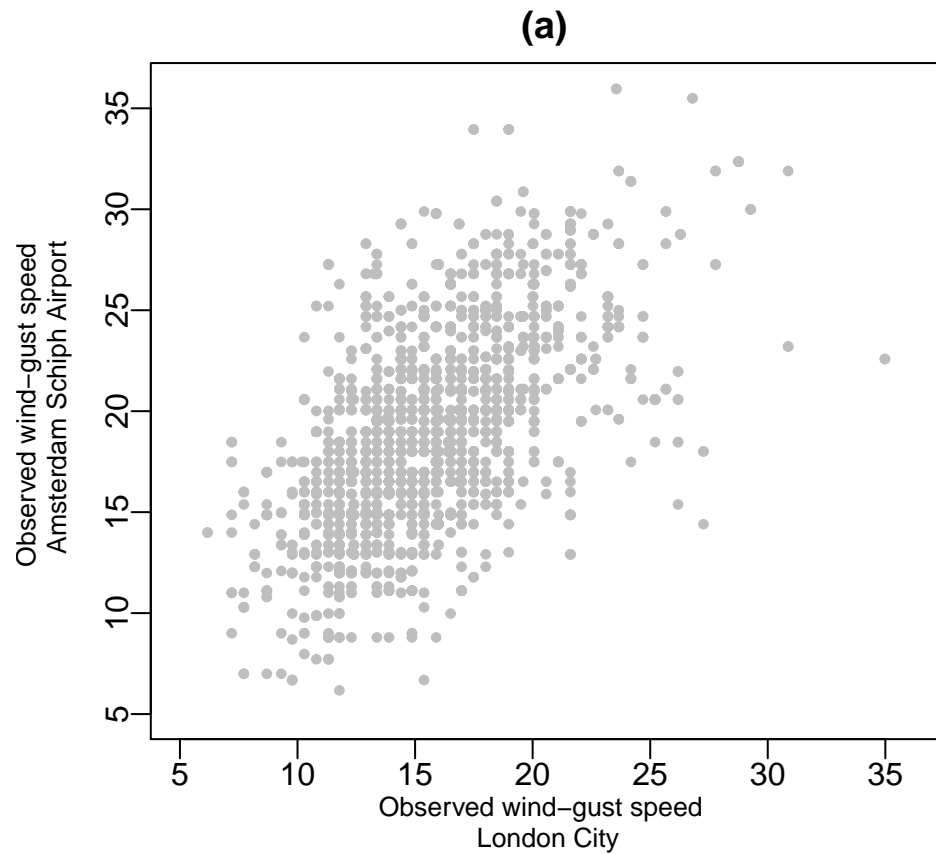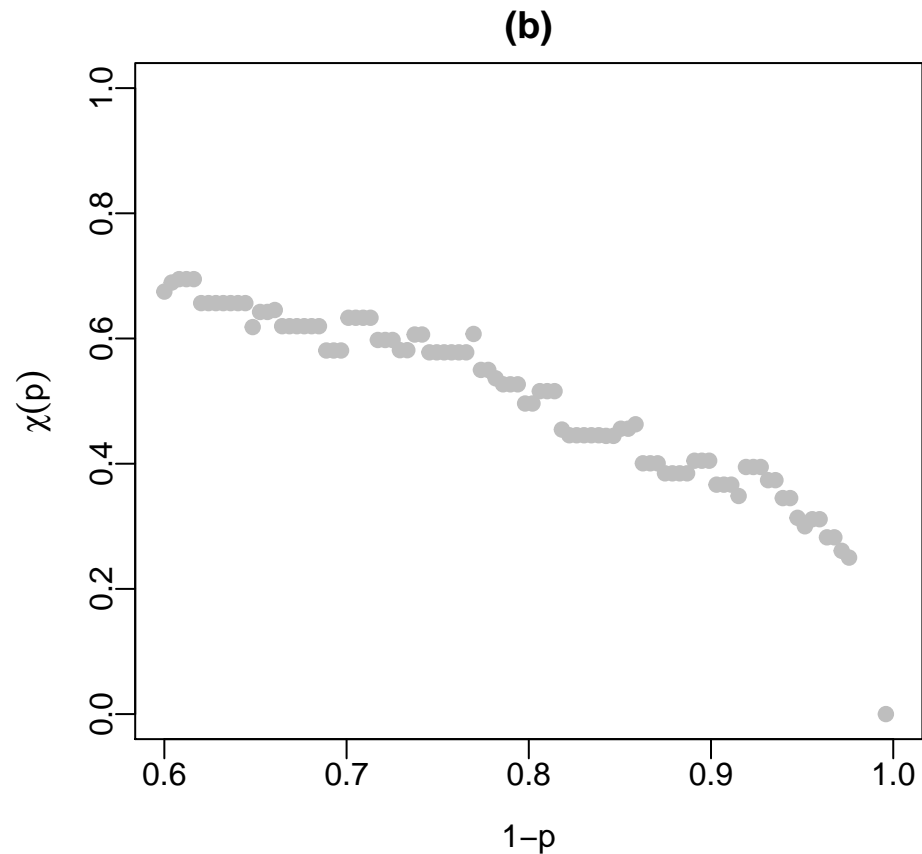

Supplement: Supplementary file 4 [file nhess-18-2933-2018-supplement.zip]

**(a)**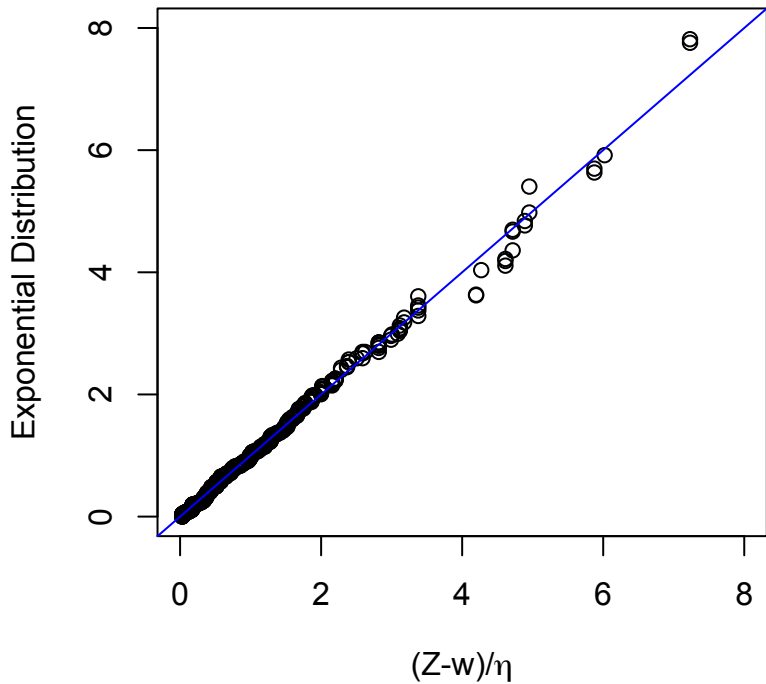**(b)**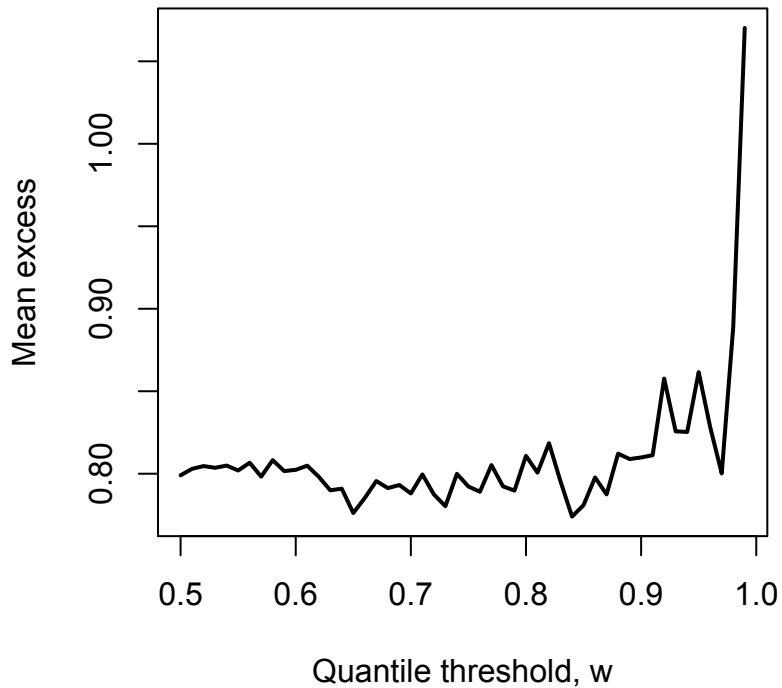

Supplement: Supplementary file 5 [file nhess-18-2933-2018-supplement.zip]
